# Supplementary material for: Camouflage Management of Adult Bimaxillary Protrusion With Pre-Existing Mandibular First Molar Loss: A Three-Premolar Extraction Case Report
Source: Research Square preprint supplement (doi:10.21203/rs.3.rs-8270224/v1), 2025-12-09
Supplement: Supplementary file 1 [file 1ba5881e48a1d63f7cc1f843.docx]

**CARE Checklist — BMC Oral Health Case Report**

**Completion (author to verify)**

Title: Includes the words “case report” and key features of the case. — Included: Yes | Location: See section headings.

Keywords: 3–6 MeSH terms. — Included: Yes | Location: See section headings.

Abstract: Structured: Background, Case Presentation, Outcome, Conclusion. — Included: Yes | Location: See section headings.

Introduction/Background: Brief context and rationale. — Included: Yes | Location: See section headings.

Patient Information: De‑identified demographics, chief complaint, history. — Included: Yes | Location: See section headings.

Clinical Findings: Relevant exam findings. — Included: Yes | Location: See section headings.

Timeline: Chronological summary of key diagnostic and treatment events. — Included: Yes | Location: See section headings.

Diagnostic Assessment: Imaging, cephalometric analysis, diagnosis. — Included: Yes | Location: See section headings.

Therapeutic Intervention: Treatment objectives, alternatives, and procedures. — Included: Yes | Location: See section headings.

Follow‑up and Outcomes: Clinical/radiographic outcomes; patient satisfaction. — Included: Yes | Location: See section headings.

Discussion: Strengths/limitations, literature context, rationale. — Included: Yes | Location: See section headings.

Patient Perspective: Patient’s own view (if available). — Included: Yes | Location: See section headings.

Informed Consent: Statement confirming written consent for publication. — Included: Yes | Location: See section headings.

**Author & Ethics**

Author: Dr. Salah M. Bin Hafedh

Affiliation: Faculty of Dentistry, Sana’a University, Yemen; PhD Candidate, Universiti Sains Malaysia (USM).

Consent: Written informed consent obtained from the patient.

Competing interests: None declared.
